# Supplementary material
Source: Springer Nature journal article supplement (https://www.springermedizin.de/resource/supplementary/12885_2011_2958_MOESM1_ESM.pdf/9462364)
Supplement: MOESM1 [file 9462364]

Eligible patient  
Identification at  
each geographic  
site

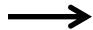

Stratify

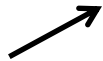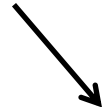

Preinvasive  
high- grade lesions  
(N=160)

Invasive cancers  
(N=240)

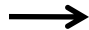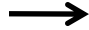

Randomize

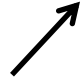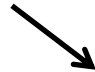

FV\*-guided surgery  
(N= 80 + 120)

Conventional surgery  
(Non -FV-guided)  
(N=80 + 120)

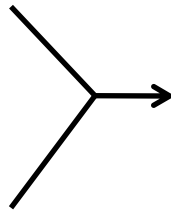

Endpoint  
Local  
recurrence

\* FV: fluorescence visualization
